# Supplementary material for: A Biocompatible and Biodegradable Protein Hydrogel with Green and Red Autofluorescence: Preparation, Characterization and In Vivo Biodegradation Tracking and Modeling
Source: PubMed Central journal article supplement (PMC4728389; doi:10.1038/srep19370), 2016-01-27
Supplement: srep19370-s1.pdf [file srep19370-s1.pdf]

## Supplement Materials

### **A Biocompatible and Biodegradable Protein Hydrogel with Green and Red Autofluorescence: Preparation, Characterization and *In Vivo* Biodegradation Tracking and Modeling**

Xiaoyu Ma<sup>1</sup>, Xiancheng Sun<sup>2</sup>, Derek Hargrove<sup>3</sup>, Jun Chen<sup>1</sup>, Donghui Song<sup>3</sup>, Qiuchen Dong<sup>1</sup>, Xiuling Lu<sup>3</sup>, Tai-Hsi Fan<sup>4</sup>, Youjun Fu<sup>5</sup>, Yu Lei<sup>1,2\*</sup>

<sup>1</sup>Department of Biomedical Engineering, University of Connecticut, Storrs, CT 06269, USA

<sup>2</sup>Department of Chemical and Biomolecular Engineering, University of Connecticut, Storrs, CT 06269, USA

<sup>3</sup>Department of Pharmaceutical Sciences, University of Connecticut, Storrs, CT 06269, USA

<sup>4</sup>Department of Mechanical Engineering, University of Connecticut, Storrs, CT 06269, USA

<sup>5</sup>Department of Chemistry, University of Connecticut, Storrs, CT 06269, USA

\* To whom correspondence should be addressed:

Email: [ylei@engr.uconn.edu](mailto:ylei@engr.uconn.edu)

Tel: 1-860-486-4554 Fax : 1-860-486-2959

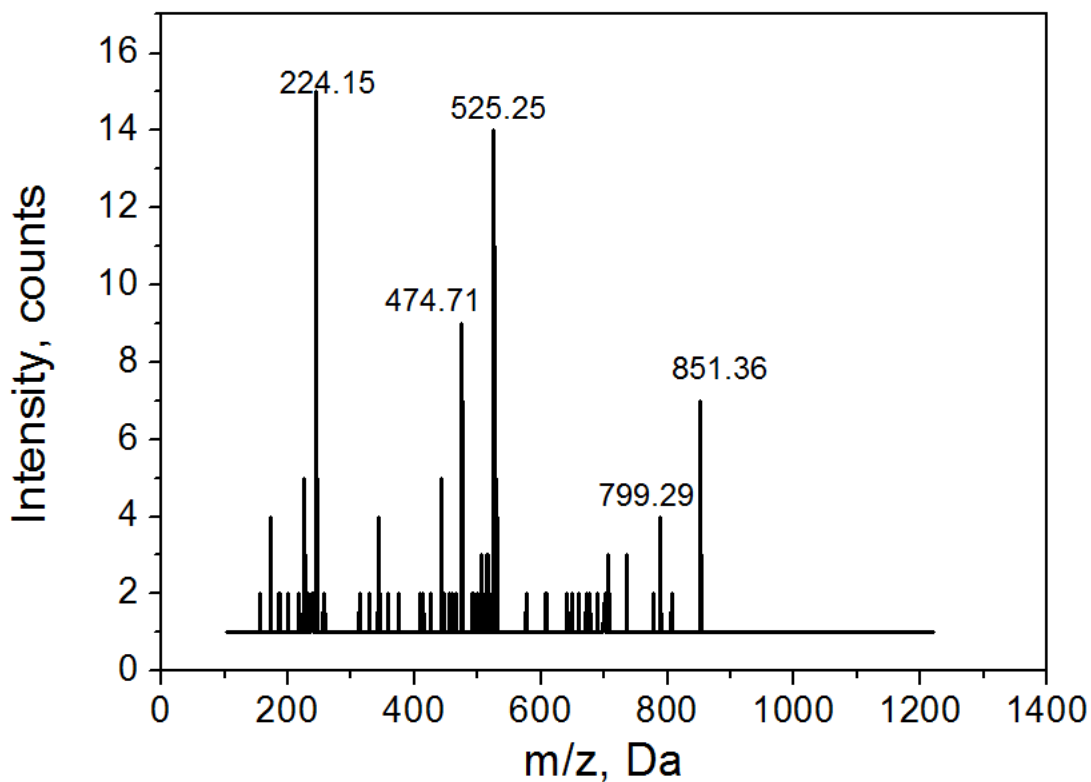

Figure S1| LC-MS result for GA cross-linked BSA hydrogel digested by Proteinase K.

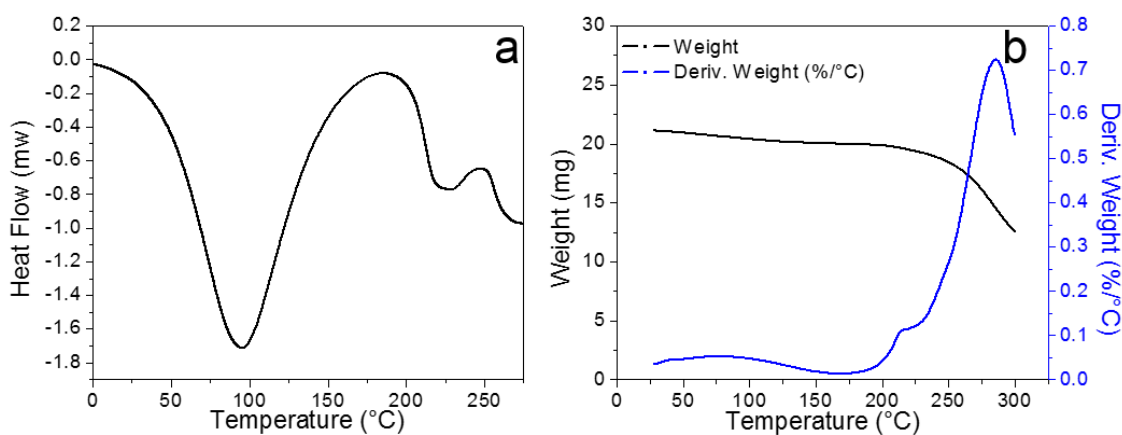

Figure S2| Thermal stability results. (a) DSC thermogram of the cross-linked BSA hydrogel; (b) TGA result of the cross-linked BSA hydrogel.

Differential Scanning Calorimetry (DSC) and Thermogravimetric Analysis (TGA) techniques were employed to study the thermal properties of the cross-linked BSA hydrogel. Unlike BSA particle whose melting point is  $\sim 68$  °C, the DSC data of the as-prepared cross-linked BSA hydrogel shows a big peak centered at  $\sim 95$  °C (Fig. S2a), which can be attributed to the fact that

chemical crosslinking of BSA increases the melting point of the hydrogel. TGA study indicates that the as-prepared hydrogel starts to decompose from  $\sim 180$  °C (Fig. S2b).

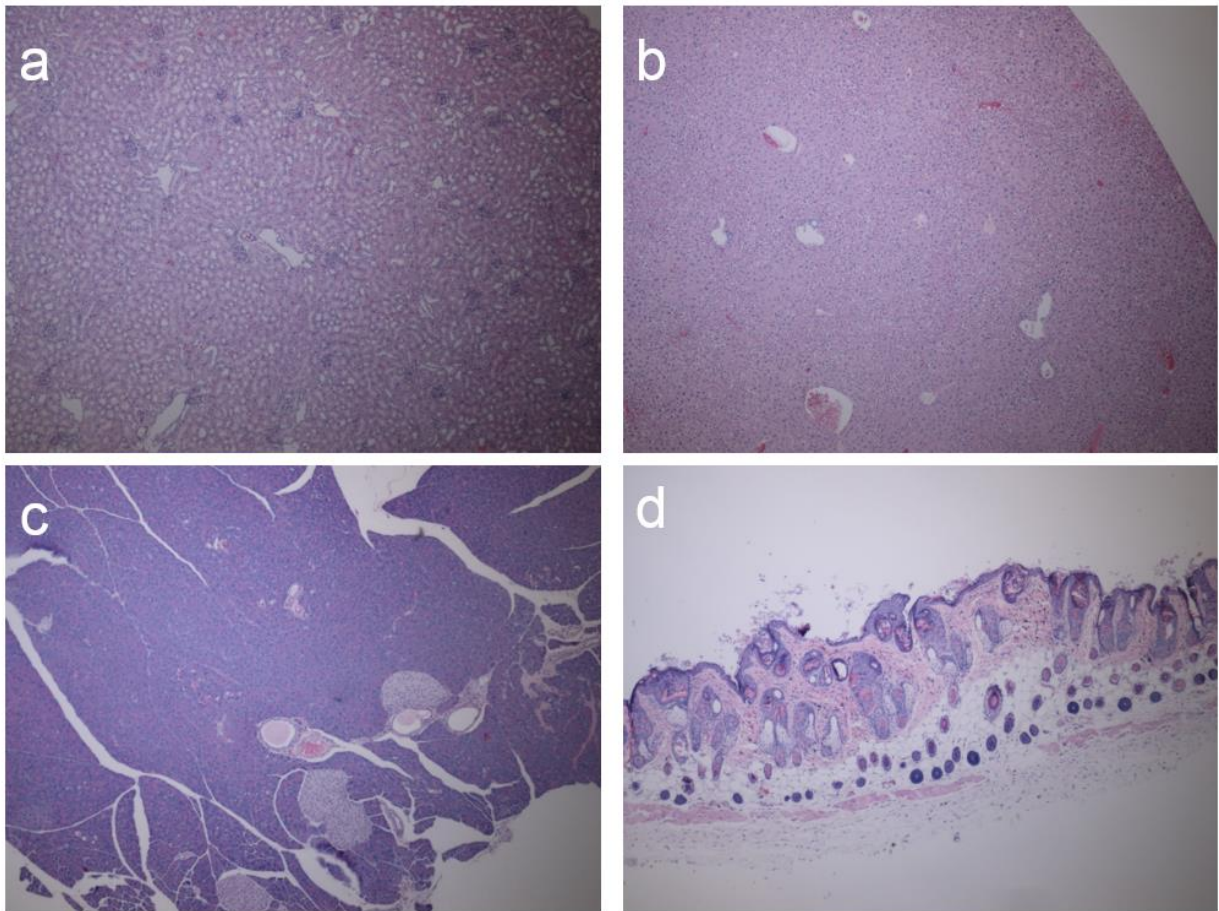

Figure S3| Histology study. (a) Kidney tissue images (40 $\times$ ); (b) Liver tissue image (40 $\times$ ); (c) Pancreas tissue image (40 $\times$ ); (d) Skin tissue image (40 $\times$ ).
